# Supplementary material for: The RIF1-long splice variant promotes G1 phase 53BP1 nuclear bodies to protect against replication stress
Source: eLife. 2020 Nov 3;9:e58020. doi: 10.7554/eLife.58020 (PMC7671687; doi:10.7554/eLife.58020)
Supplement: Source data 1. [file elife-58020-data1.xlsx]

## Sheet: Figure 1B
APH (µM)	siControl			siRIF1
0	1.01	0.89	1.1	0.78	1.15	1.07
0.6	0.62	0.56	0.5	0.19	0.15	0.15

## Sheet: Figure 1C
APH (µM)	RIF1		RIF1 KO
0	0.996667	1	1	1
0.6	0.56	0.34	0.193333	0.06

## Sheet: Figure 2A
APH (µM)	no auxin			+ auxin
0	1	1	1.00333	1	1	1
0.3	0.88	0.916667	0.8	0.41	0.493333	0.306667
0.6	0.55	0.823333	0.513333	0.4	0.24	0.32
1	0.58	0.69	0.533333	0.29	0.233333	0.253333

## Sheet: Figure 2D
APH (µM)	RIF1 +		RIF1-		I		II
1	1	1	0.3	0.26	0.4	0.27	0.33	0.18

## Sheet: Figure 2-figure supplement 2A
APH (µM)	mAC-RIF1 DOX&Auxin			RIF1 KO
0	1.06	1.01	0.93	1.07	0.95	0.97
0.3	0.52	0.39	0.44	0.37	0.53	0.51
0.6	0.25	0.34	0.42	0.37	0.47	0.31
1	0.15	0.22	0.17	0.21	0.18	0.18

## Sheet: Figure 2-figure supplement 2C
Experiment 1
RIF1 +			RIF1-			I			II
1.1	0.94	0.96	0.21	0.24	0.32	0.19	0.29	0.32	0.21	0.21	0.13
Experiment 2
RIF1 +			RIF1-			I			II
1.06	0.92	1.02	0.29	0.31	0.31	0.47	0.37	0.37	0.35	0.39	0.24

## Sheet: Figure 2-figure supplement 2E
Experiment 1
APH (µM)	RIF1+			RIF1-			III			IV
0	0.94	0.95	1.11	0.94	1.07	0.99	0.95	1.07	0.98	0.92	1.21	0.88
0.3	0.95	0.94	0.86	0.43	0.51	0.54	0.37	0.51	0.41	0.75	0.78	0.72
0.6	0.82	0.91	0.74	0.22		0.26	0.26	0.32	0.24	0.41	0.46	0.41
1	0.74	0.65	0.68	0.22	0.32	0.16	0.21	0.27	0.23	0.19	0.29	0.31
Experiment 2
APH (µM)	RIF1+			RIF1-			III			IV
0	0.99	1.09	0.93	1.02	1.02	0.96	1.04	0.98	0.98	0.92	1.15	0.93
0.3	0.88	0.76	0.76	0.35	0.34	0.23	0.38	0.35	0.48	0.72	0.83	0.55
0.6	0.57	0.44	0.53	0.34	0.26	0.36	0.45	0.26	0.25	0.45	0.37	0.31
1	0.46	0.68	0.46	0.26	0.25	0.25	0.14	0.25	0.27	0.13	0.25	0.3

## Sheet: Figure 3C
APH (µM)	mAC-RIF1		RIF1 KO		mAC-RIF1-L		mAC-RIF1-S
0	1	1	1	1	1	1	1	1.01
0.3	0.57	0.64	0.21	0.19	0.58	0.44	0.4	0.23
0.6	0.56	0.34	0.19	0.06	0.54	0.38	0.19	0.14
1	0.42	0.33	0.15	0.07	0.5	0.36	0.18	0.09

## Sheet: Figure 3D
	RIF1L + DOX		RIF1S + DOX		RIF1L - DOX		RIF1S - DOX
0	1	1.00333	1	1	1.01667	1	1.00333	1
0.3	0.77	0.63	0.363333	0.186667	0.576667	0.32	0.626667	0.12
0.6	0.74	0.57	0.056667	0.07	0.143333	0.173333	0.1	0.036667
1	0.556667	0.466667	0.04	0.063333	0.033333	0.086667	0.06	0.01

## Sheet: Figure 3F
GFP +siCont	GFP +siRIF1	GFP-RIF1-L	GFP-RIF1-S
1.131	0.749	0.929	1.089
0.969	0.874	1.23	1.033
0.717	0.732	0.558	1.157
0.969	0.777	1.315	1.285
0.928	0.502	0.808	0.882
1.109	0.582	1.004	1.121
1.183	0.927	1.148	0.813
0.884	0.577	0.787	0.633
0.879	0.592	0.747	0.655
1.15	1.257	1.181	1.688
0.726	0.321	0.742	0.309
1.029	1.374	1.044	1.41
1.162	0.91	0.689	1.158
1.091	1.537	1.377	0.991
0.927	0.969	0.525	1.247
0.925	0.828	0.967	0.965
1.062	0.773	0.753	1.048
0.901	0.713	0.821	0.94
1.157	0.241	1.307	0.971
0.836	0.703	1.079	1.23
1.066	0.73	0.792	1.088
1.349	0.666	0.808	1.267
0.919	0.758	1.368	0.907
1.309	0.846	0.84	0.996
1.145	0.811	1.139	1.113
0.965	0.471	0.814	0.846
0.933	0.885	0.867	0.961
1.19	0.351	1.557	0.958
1.012	1.08	0.95	0.918
0.895	0.698	1.32	0.946
1.232	0.332	0.53	0.814
1.012	0.908	0.967	1.088
1.026	0.718	0.795	0.82
0.915	0.667	0.862	1.036
1.188	0.812	1.785	0.963
1.051	0.902	1.261	0.979
0.833	0.754	0.659	0.578
0.946	0.953	0.99	0.927
1.622	0.91	0.971	0.726
0.921	0.922	0.945	0.765
0.944	0.792	0.959	0.707
1.029	0.945	0.573	1.031
0.884	0.63	0.89	0.828
1.402	0.612	0.953	1.207
0.93	0.897	0.923	0.718
0.941	0.592	0.769	1.196
0.871	0.53	0.744	0.722
1.429	0.934	1.158	1.276
0.843	1.161	0.906	0.779
1.304	0.518	0.748	0.924
0.838	0.685	1.122	0.861
0.824	0.612	1.643	0.786
0.986	0.529	1.071	1.014
1.214	0.518	0.85	1.363
0.778	0.818	1.582	1.004
1.229	0.963	1.079	1.02
1.266	1.232	0.961	0.742
0.875	0.924	0.475	1.265
0.838	0.863	1.434	1.104
0.997	0.798	0.937	1.088
0.781	0.683	0.886	0.681
1.027	0.739	1.058	0.849
0.993	0.94	0.795	0.914
1.11	0.816	0.926	0.898
0.687	0.988	1.138	0.777
0.854	0.784	1.067	1.388
0.77	0.795	0.979	0.786
1.095	0.78	0.97	0.859
0.865	0.916	0.692	0.983
1.017	0.765	1.247	0.74
0.947	1.008	1.17	1.138
0.952	0.934	1.314	0.871
0.949	0.613	0.97	1.337
0.887	0.817	1.002	1.045
1.018	0.988	0.891	0.67
	0.658		1.236
	0.869		0.919
			1.402
			1.356
			0.841
			0.868
			0.759
			0.339

[truncated: 17 more sheets: Figure 3I, Figure 3-figure supplement 2, Figure 3-figure supplement 3D, Figure 3-figure supplement 3E, Figure 3-figure supplement 3F, Figure 3-figure supplement 4B, Figure 3-figure supplement 5, Figure 4A(ii), Figure 4B(ii), Figure 4-figure supplement 1A, Figure 4-figure supplement 1B, Figure 5B, Figure 5C, Figure 5D, Figure 5-figure supplement 1C, Figure 5-figure supplement 1D, Figure 5-figure supplement 2B]
