# Supplementary material for: The RIF1-long splice variant promotes G1 phase 53BP1 nuclear bodies to protect against replication stress
Source: eLife journal article supplement (doi:10.7554/elife.58020), 2020-11-03
Supplement: supp [file elife_poa_e58020_Figure_3_figure_supplement_1.pdf › elife_poa_e58020_Figure_3_figure_supplement_1.pdf]

| <b>Tissue</b>                  | <b>% L</b> | <b>% S</b> |
|--------------------------------|------------|------------|
| Adrenal Gland                  | 63         | 37         |
| Bone marrow                    | 70         | 30         |
| Brain                          | 85         | 15         |
| Bronchus                       | 75         | 25         |
| Cervix                         | 75         | 25         |
| Colon                          | 64         | 36         |
| Descending part of duodenum    | 72         | 28         |
| Epididymis                     | 74         | 26         |
| Esophagus                      | 71         | 29         |
| Heart                          | 83         | 17         |
| Heart, Ventricle (left)        | 80         | 20         |
| Heart, Ventricle (right)       | 76         | 24         |
| Intestine (small)              | 75         | 25         |
| Kidney                         | 67         | 33         |
| Larynx                         | 65         | 35         |
| Liver                          | ND         | ND         |
| Lung                           | 77         | 23         |
| Lymph node                     | 69         | 31         |
| Lymphocytes (peripheral blood) | 68         | 32         |
| Mammary gland                  | 100        | 0          |
| Muscle                         | 62         | 8          |
| Nasal mucosa                   | 84         | 16         |
| Optic nerve                    | 85         | 15         |
| Ovary                          | 63         | 37         |
| Oviduct                        | 77         | 23         |
| Pancreas                       | 76         | 24         |
| Penis                          | 0          | 100        |
| Pericardium                    | 87         | 13         |
| Pituitary                      | 83         | 17         |
| Placenta                       | 63         | 37         |
| Prostate                       | 69         | 31         |
| Retina                         | 78         | 22         |
| Salivary gland                 | 78         | 22         |
| Skin                           | 64         | 36         |
| Spinal cord                    | 75         | 25         |
| Spleen                         | 70         | 30         |
| Stomach                        | ND         | ND         |
| Testis                         | 44         | 56         |
| Thymus                         | 60         | 40         |
| Thyroid                        | 82         | 18         |
| Tongue                         | ND         | ND         |
| Tonsil                         | 70         | 30         |
| Trachea                        | ND         | ND         |
| Ureter                         | 71         | 29         |
| Urinary bladder                | 77         | 23         |
| Uterus                         | 81         | 19         |
| Uvula                          | 64         | 36         |
| Vagina                         | 78         | 22         |
