# Supplementary figures and images for: The RIF1-long splice variant promotes G1 phase 53BP1 nuclear bodies to protect against replication stress
Source: eLife journal article supplement (doi:10.7554/elife.58020), 2020-11-03

**A**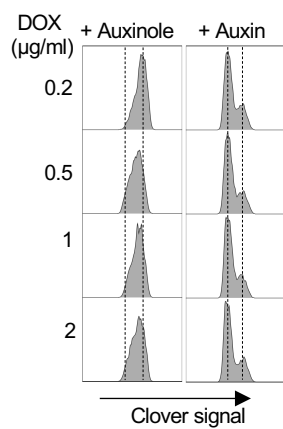**B**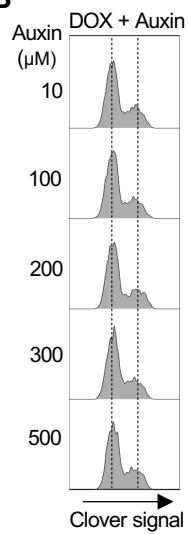

Supplement: supp [file elife_poa_e58020_Figure_1_figure_supplement_1.pdf › elife_poa_e58020_Figure_1_figure_supplement_1.pdf]

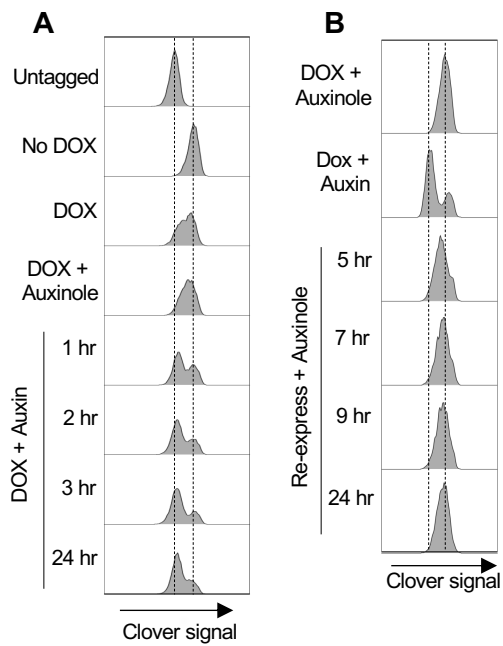

Supplement: supp [file elife_poa_e58020_Figure_2_figure_supplement_1.pdf › elife_poa_e58020_Figure_2_figure_supplement_1.pdf]

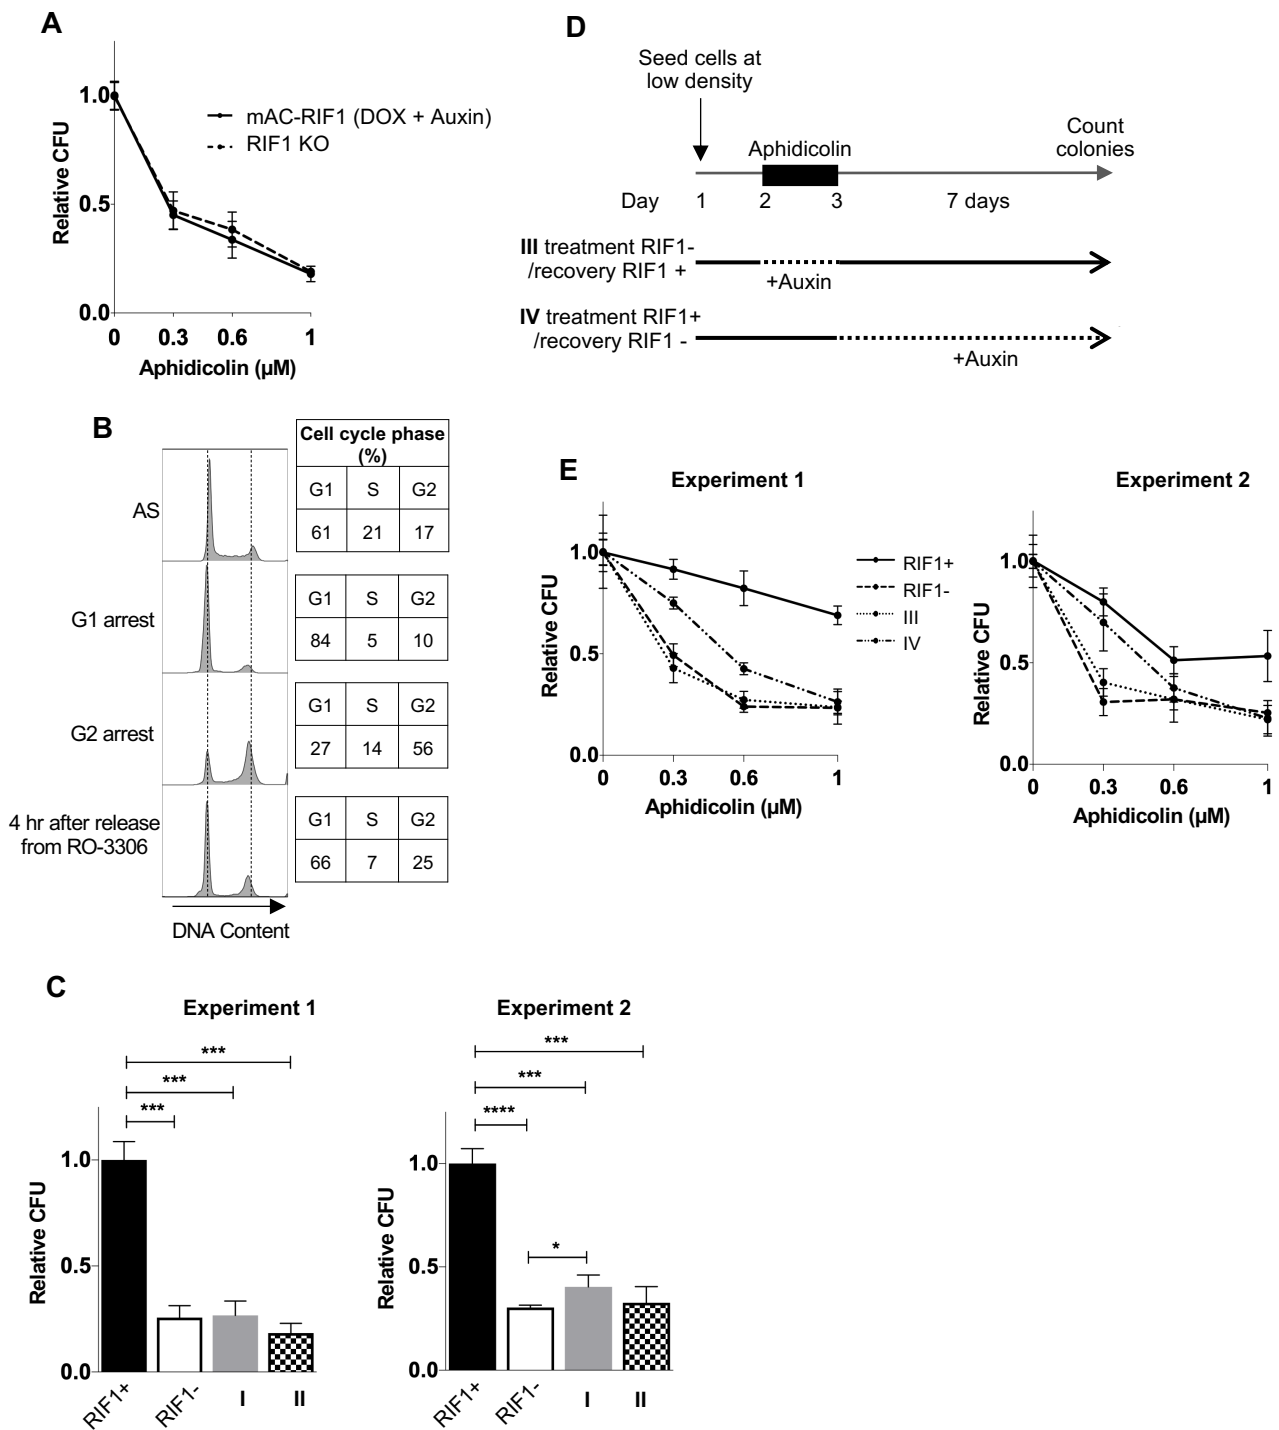

Supplement: supp [file elife_poa_e58020_Figure_2_figure_supplement_2.pdf › elife_poa_e58020_Figure_2_figure_supplement_2.pdf]

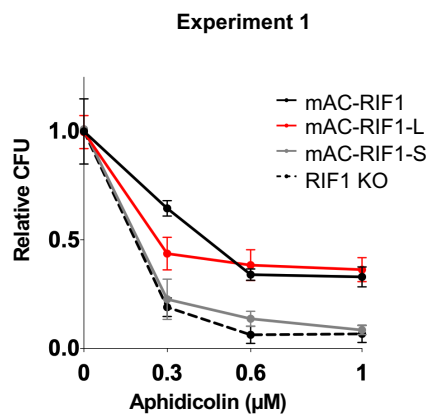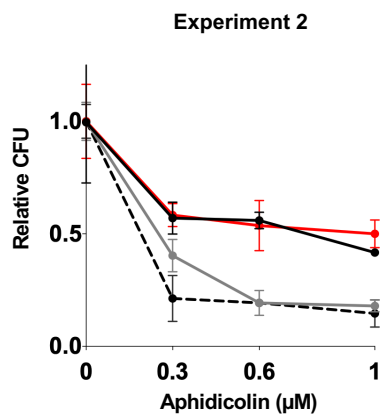

Supplement: supp [file elife_poa_e58020_Figure_3_figure_supplement_2.pdf › elife_poa_e58020_Figure_3_figure_supplement_2.pdf]

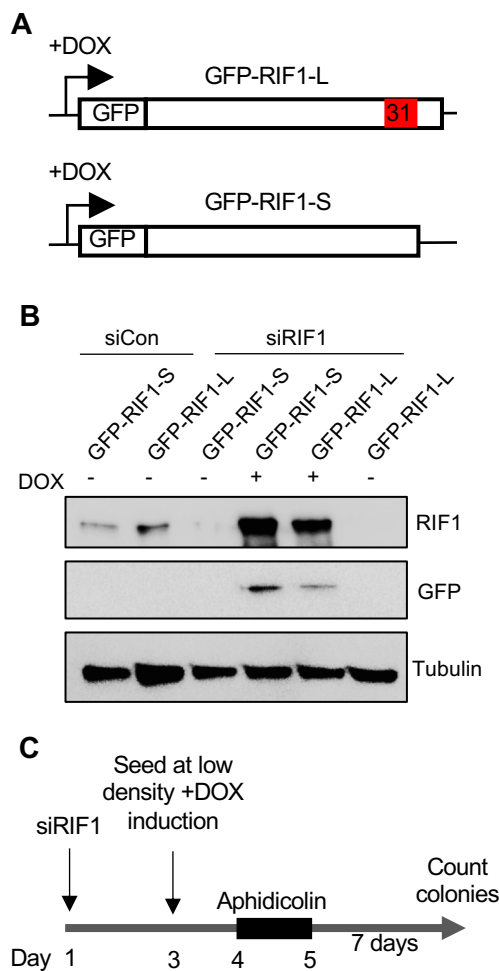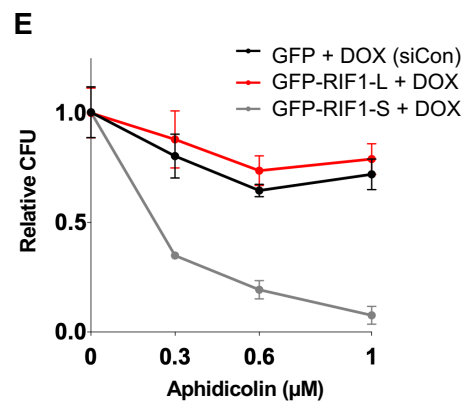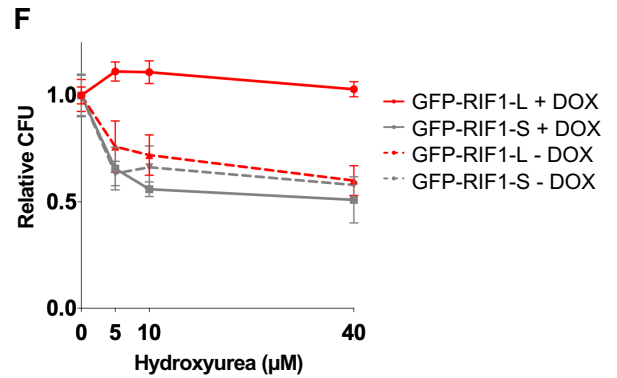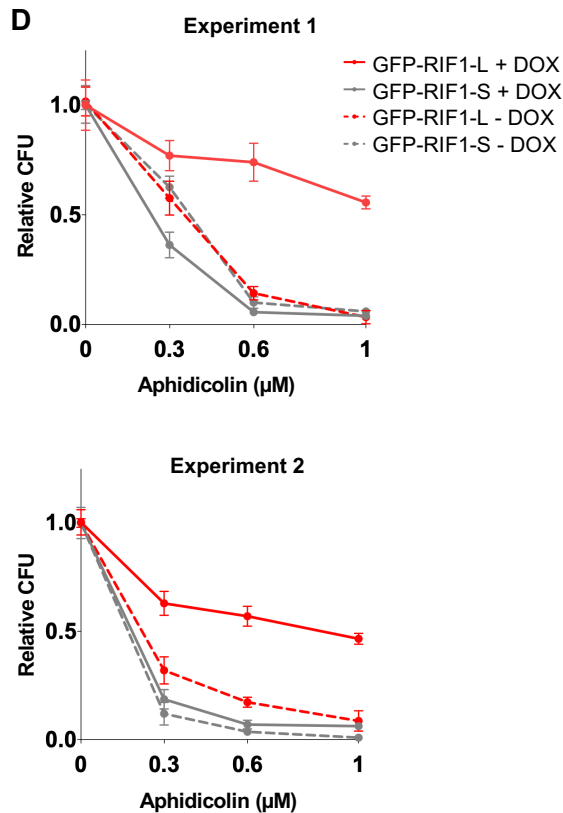

Supplement: supp [file elife_poa_e58020_Figure_3_figure_supplement_3.pdf › elife_poa_e58020_Figure_3_figure_supplement_3.pdf]

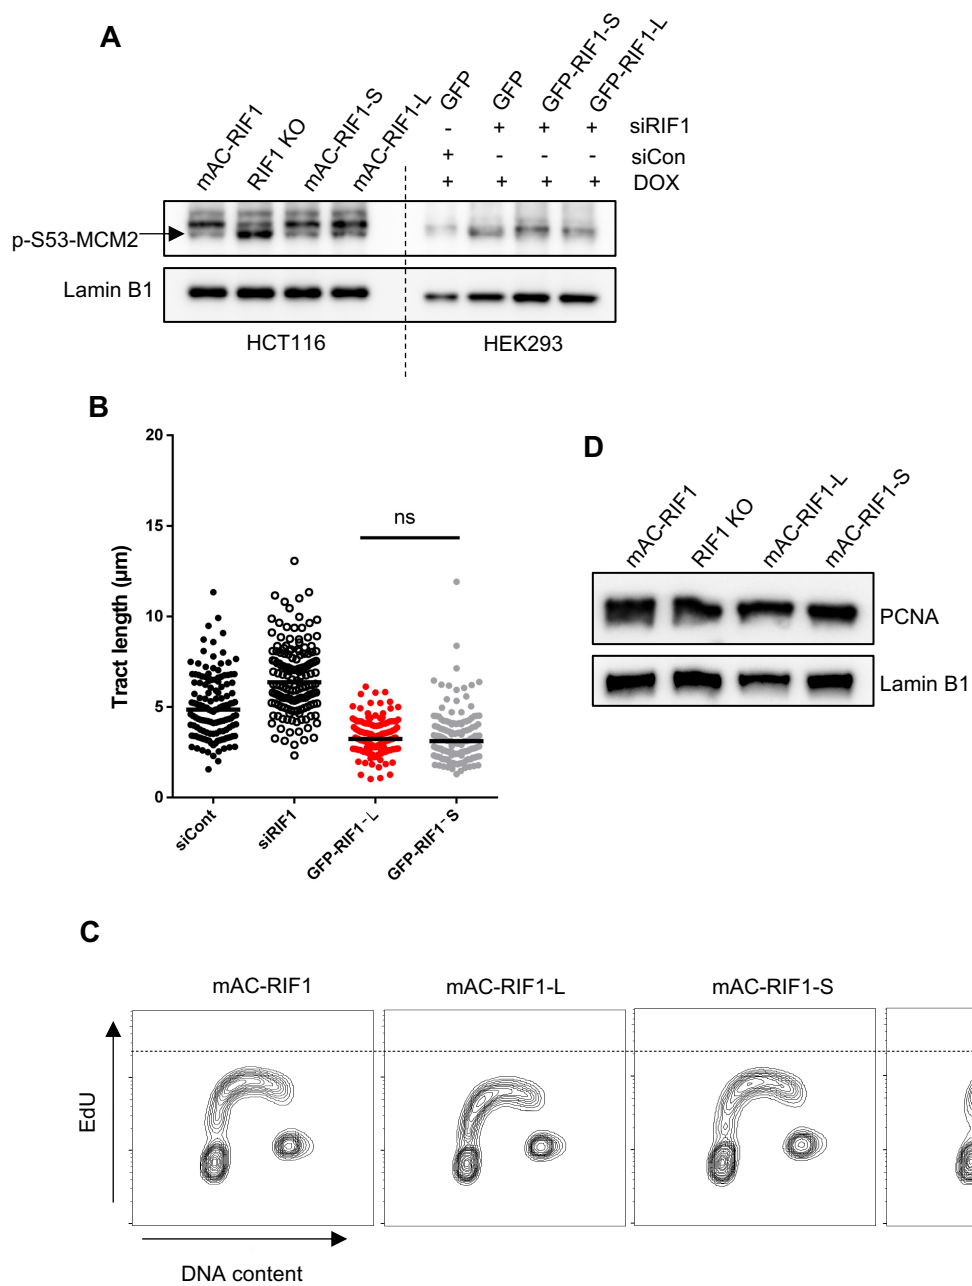

Supplement: supp [file elife_poa_e58020_Figure_3_figure_supplement_4.pdf › elife_poa_e58020_Figure_3_figure_supplement_4.pdf]

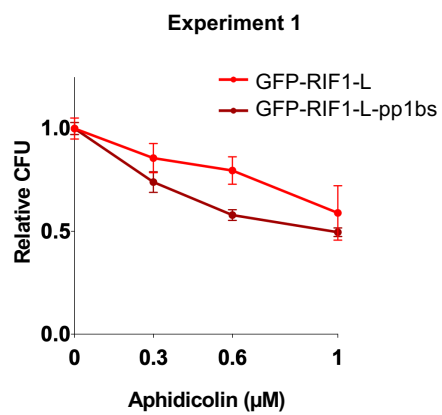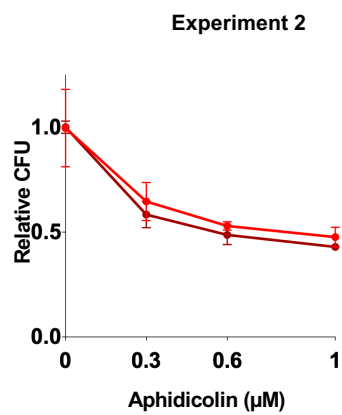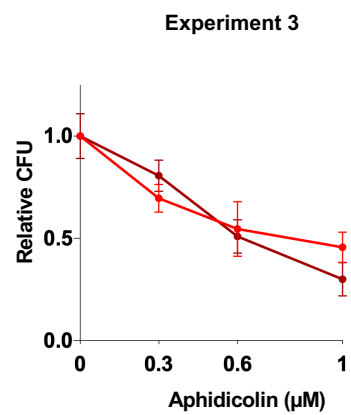

Supplement: supp [file elife_poa_e58020_Figure_3_figure_supplement_5.pdf › elife_poa_e58020_Figure_3_figure_supplement_5.pdf]

**A**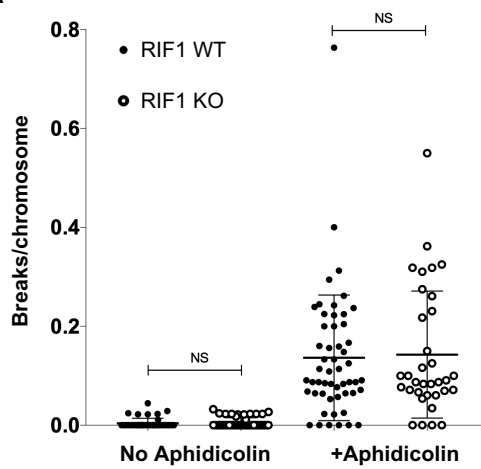**B**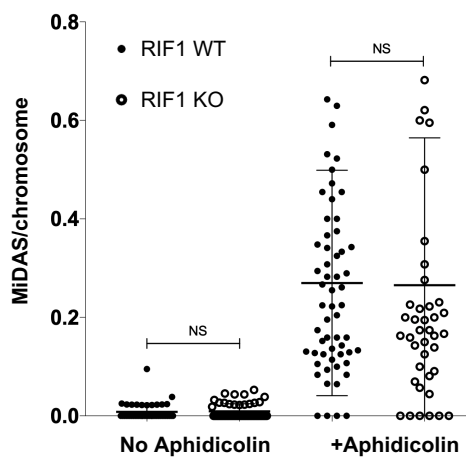

Supplement: supp [file elife_poa_e58020_Figure_4_figure_supplement_1.pdf › elife_poa_e58020_Figure_4_figure_supplement_1.pdf]

**A**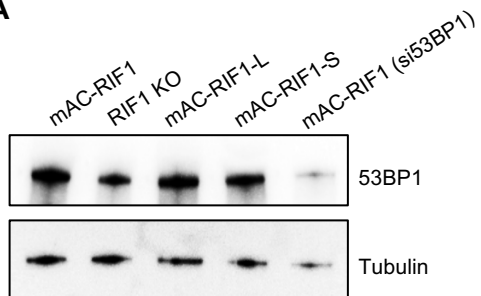**B**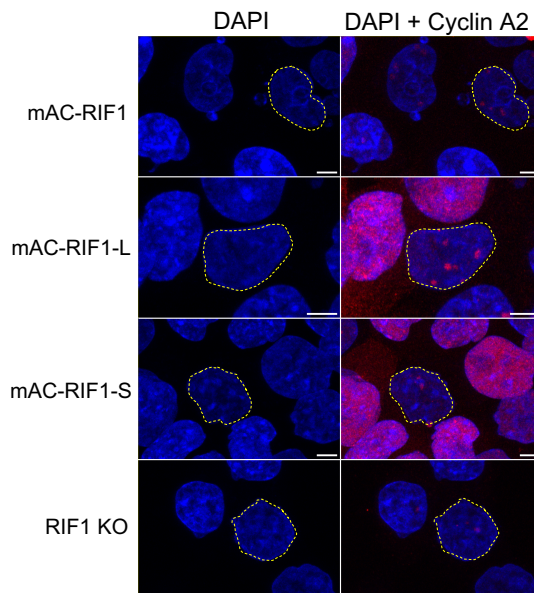**C**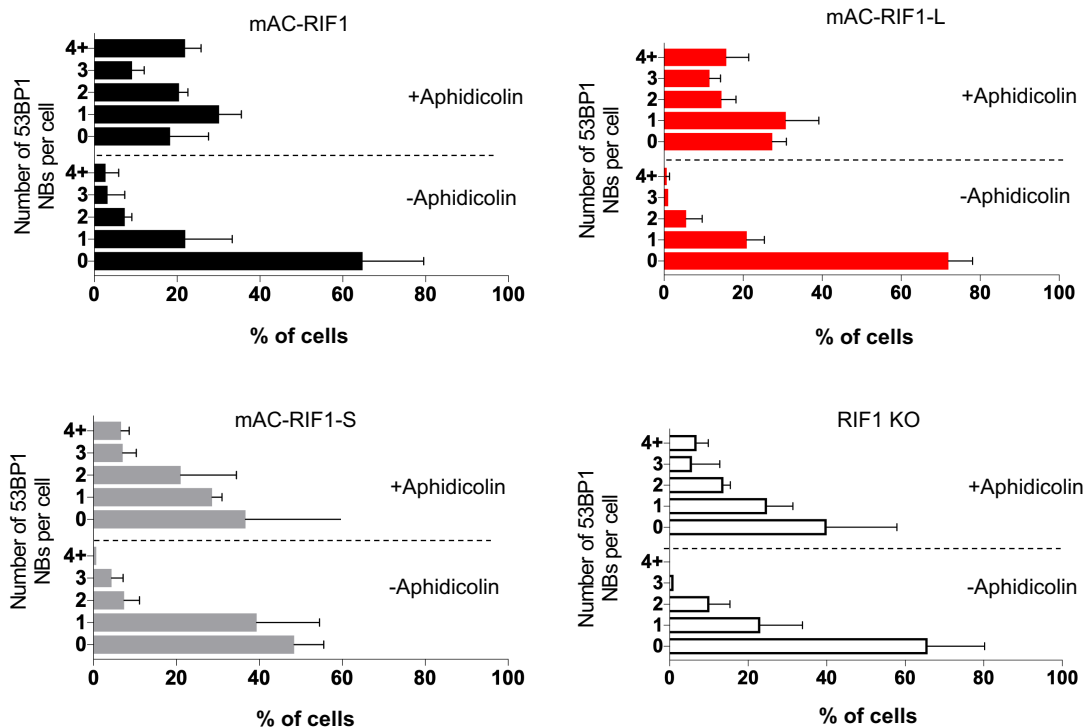**D**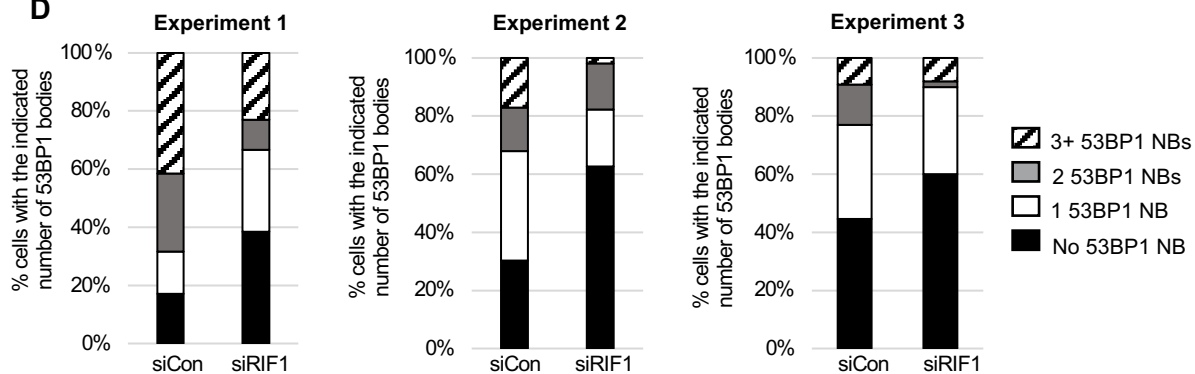

Supplement: supp [file elife_poa_e58020_Figure_5_figure_supplement_1.pdf › elife_poa_e58020_Figure_5_figure_supplement_1.pdf]

**A**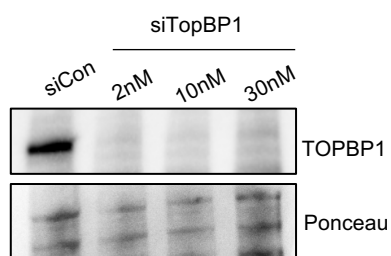**B**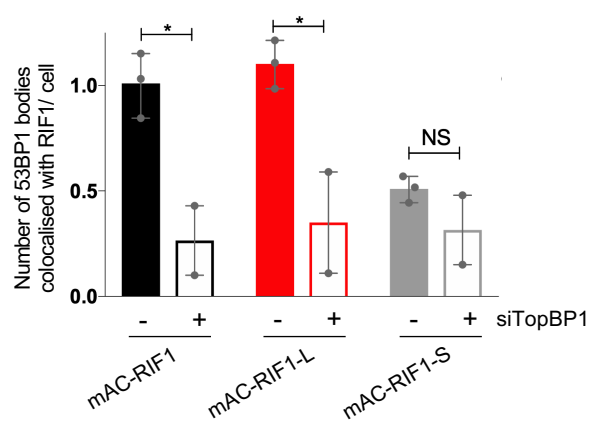

Supplement: supp [file elife_poa_e58020_Figure_5_figure_supplement_2.pdf › elife_poa_e58020_Figure_5_figure_supplement_2.pdf]
